# Supplementary material for: Genome-Wide RNAi Screening Identifies Novel Pathways/Genes Involved in Oxidative Stress and Repurposable Drugs to Preserve Cystic Fibrosis Airway Epithelial Cell Integrity
Source: MDPI journal article supplement (doi:10.3390/antiox10121936), 2021-12-02
Supplement: s1 [file s1]

# Supplementary Tables

**Table S1.** Primer sequences for randomized siRNA library generation/screening, and pre-designed siRNAs directed against the TNFRSF1B and KCNQ1OT1 transcripts.

| Primer Sequences                                     |                                                                             |              |
|------------------------------------------------------|-----------------------------------------------------------------------------|--------------|
| Name                                                 | Sequence (5' → 3')                                                          | Number of Nt |
| Clal/NotI F                                          | CCGCGCATCGATGCGGCCGCCAAGGTCGGGCAGGAAGAGGGCCTA                               | 45           |
| EcoRI-H1 R                                           | CGCGAATTCGAACGCTGACGTCATCAACCCGCTCCAAGGAATCGC                               | 45           |
| BamHI-MluI-siRNA(EGFP)-SmaI R                        | GCGCGGATCACGCGTAAAACTTCAGGGTCAGCTT-GCCGTTTTTCCCGGGCTTTCCACAA                | 60           |
| pLIB-N R                                             | TGTGGAAAGCCCCGGGAAAAAGNNNNNNNNNNNNNNNNNNNTTTTAC-GCGTGTCTCATACAGAACTTATAAGAT | 73           |
| pCI-neo(CMV-)LIB F                                   | TTCAAGAACTCTGTAGCACC GCCT                                                   | 24           |
| pJET 1.2 F                                           | CGACTCACTATAGGGAGAGCGGC                                                     | 23           |
| pJET 1.2 R                                           | AAGAACATCGATTTTCCATGGCAG                                                    | 24           |
| Pre-designed siRNAs                                  |                                                                             |              |
| siRNA name                                           | Sequence (5' → 3')                                                          |              |
| ON-TARGET plus Non-targeting siRNA (C-)              | UGGUUUACAUGUCGACUAA                                                         |              |
| TNFRSF1B                                             |                                                                             |              |
| ON-TARGET plus SMART pool siRNA J-003934-05 (siRNA1) | CGACUUCGCUCUUC CAGUU                                                        |              |
| ON-TARGET plus SMART pool siRNA J-003934-06 (siRNA2) | GGAAUGUGCCUUUCGGUCA                                                         |              |
| ON-TARGET plus SMART pool siRNA J-003934-07 (siRNA3) | CAUCAGACGUGGUGUGCAA                                                         |              |
| ON-TARGET plus SMART pool siRNA J-003934-08 (siRNA4) | AGCCUUGGGUCUACUAAUA                                                         |              |
| KCNQ1OT1                                             |                                                                             |              |
| Lincode SMART pool siRNA N-188025-01 (siRNA1)        | GCCAAGAACCAACGAAUGA                                                         |              |
| Lincode SMART pool siRNA N-188025-02 (siRNA2)        | GCAUAUCUGUCUUC CGUAU                                                        |              |
| Lincode SMART pool siRNA N-188025-03 (siRNA3)        | GAAUACAGAGAACGGCUGA                                                         |              |
| Lincode SMART pool siRNA N-188025-04 (siRNA4)        | GAAUACAUAAGCACGAUU                                                          |              |

**Table S2.** List of the final 167 siRNA sequences obtained through randomized siRNA library screening in 6CFSMEo- cells.

| siRNA_id * | siRNA_seq (5' → 3')  | siRNA_id | siRNA_seq (5' → 3')  |
|------------|----------------------|----------|----------------------|
| 1          | GTATACCCTGTACTAGTTG  | 92       | GAGGGTGATGTTTGCTGG   |
| 2          | GGCATTGGCCTATTGGTAT  | 93       | GGGATCGATACCACTACTT  |
| 3          | GAGCGAGCTACGGGACTCT  | 94       | GGCTCTGTGTATGTAAGTC  |
| 4          | GTGGGCCAGCGTACTTTC   | 95       | GGCTGGTCATAACCTCTCT  |
| 5          | GCGTTATGGTGTTGGTAAC  | 96       | GACGTGAACGAAAGACTTA  |
| 6          | GGTTAATCAAATTGGTGGA  | 97       | GGATCGATCTACGCACAGT  |
| 7          | GCGCACGGGGCGCTAGTTT  | 98       | GGTTCTTCGTACTATTGGC  |
| 8          | GGGTGCGTGGGCAGTGTGT  | 99       | GTAAAGCATAGGATGATAA  |
| 9          | GTGAGAGTGAGCGTTTATC  | 100      | GCACATGAGGGATGCAACA  |
| 10         | GTGACTTGCTTGGTACTTC  | 101      | GGTTGCTGCGAGCTGCCAC  |
| 11         | GAGCAACATACCAGTGTCTG | 102      | GAGAGTCGGAGGTACTTGC  |
| 12         | GGCTCGTCACCCGTGAATC  | 103      | GACTTTAGGACGTGCATCG  |
| 13         | GAGTCTAGATAGTGTTC    | 104      | GCACTTTATGTTCCGCTCC  |
| 14         | GTGCCAGTAAGGCCGTACC  | 105      | GGCCGGTCGGTTCTCGGTC  |
| 15         | GTCGTGCTAATGAGGATTA  | 106      | GTATTAAGGGCGATCCGTA  |
| 17         | GGCGATAGAGTTGTGCGCG  | 107      | GGGTTGCACCGCTTTCTAC  |
| 18         | GTTTGCTGGCTACTCCTTT  | 108      | GCGTGGTTCACGCTGTCCA  |
| 19         | GAGGCTTGCGTGCTGGACC  | 109      | GATGCTTGCAAGAATAATT  |
| 20         | GTGTTTTCCATGTGCTTTA  | 110      | GGGTCATGGGGGCTGCGCA  |
| 21         | GCATCTGTCATGCATACTC  | 111      | GGTCTGTGCAACCAACAAT  |
| 22         | GTCGGTATGGCTAGTTACG  | 112      | GGTCTATTTGGCATAGTAT  |
| 23         | GTATGGTCAACACAGTTCC  | 113      | GTGAGATGTAGCATATCTG  |
| 24         | GCGGCAAGCTGACCCGTAA  | 114      | GACCCGTACGTGTGATC    |
| 25         | GTTTAAGGTTGCAGTT     | 115      | GTGAGGGTTAGTCTCGTTC  |
| 26         | GGCAATGATACTTATCCTA  | 116      | GGCATATGGTTCGGTCTGGT |
| 27         | GGGTTACTTATCATGAACC  | 117      | GCACGTCTCGGAGCAGGTG  |
| 28         | GTCGCAGTCTGCATTTTGC  | 118      | GATCGCCACACGATTTCGCT |

|    |                      |     |                      |
|----|----------------------|-----|----------------------|
| 29 | GTCTTCGCCATGATTCTGG  | 119 | GGATGGTCCTTAATCGTTA  |
| 30 | GGCTCGACTGAGGTGTGGA  | 120 | GTCACGCCGCTACGCACCG  |
| 31 | GCGATACCTCCCTACGCC   | 121 | GGATGTGCTATATCTGGGA  |
| 32 | GTCTGAGAAATACTTTCGA  | 122 | GTTGCTGGGAGCCTTCCCC  |
| 33 | GATAGTCTGGGCCAATATC  | 123 | GGGTAATTGAGTCGACGTC  |
| 34 | GCGGTTTTCGATTGGGCGG  | 124 | GAACCGGTCTGGCTACAAC  |
| 35 | GGTGCCACGATATCTGAAG  | 125 | GTAACGTGGCGCGGGTACA  |
| 36 | GGTGTGTGTTTTCTACCTT  | 126 | GATGCAACCTGGTTTTTAC  |
| 37 | GGCGTGTCTGGGATGTTCCC | 127 | GGCGCTAAGGTAGCCTCAT  |
| 38 | GGCAACGCTGTGGTAATAC  | 128 | GACGCTGCCCCGCCACCGT  |
| 39 | GCATTTTCGTCTTCTTGGG  | 130 | GACAGGATAGGATTCCCTC  |
| 40 | GCTCGCGCGAAATGAGTGA  | 131 | GGAACAATGGTCTCATGTC  |
| 43 | GCGCGACGGGTCTTATCGT  | 132 | GGCCAGCCCTCGGCTTCGT  |
| 44 | GATATCTTGTGCCTGTCTGT | 133 | GACGGAACCAATTTACGTG  |
| 45 | GCGTCTTTTTTGAATGCGC  | 134 | GATGCTACGGGTTTGGTAT  |
| 47 | GGTGATCTGCTGGCTTACT  | 135 | GAATGACAGGGTCAGTATA  |
| 48 | GGCTCAGTGGATTATCATT  | 136 | GGAAGGCCAGTTTTCGTTG  |
| 49 | GTTGCTCCAACATTACATG  | 137 | GATAGAAGTGGTATTTGGC  |
| 50 | GTTGACAGGAACATAATAA  | 138 | GTGTGGGATTATCAAAACC  |
| 51 | GTGCTGGTTCAAATAGTTT  | 139 | GACGTCATGGGTTTCCGTT  |
| 52 | GGTCTTATCAACGTCATGC  | 141 | GCCCTCTCCCTTTGAGCCA  |
| 53 | GCCTAATAGTGTAGTCAAC  | 142 | GCGAATGGGAATTTCCCTCT |
| 54 | GTGCCAGAATGTGGTGCAC  | 144 | GGCAACAAAGAGGTAATAC  |
| 55 | GGAATGAGGGGACGGAGAG  | 145 | GCGGGTTTGTGTCTACTGT  |
| 56 | GGGTGTTCAAACAAATAAG  | 146 | GTCTGCCTCACTTACTATA  |
| 58 | GATAAGCACCCCAATTGAG  | 147 | GGGGAGGGCATGTTATAGA  |
| 59 | GTGTTTCCGGGGGTAAGGA  | 148 | GGTATGACGGCGTGATCAA  |
| 60 | GCTGGTTCCTGCTTCTCAT  | 149 | GCCAAGGCACCCC        |
| 61 | GTGGAAATTTTCGAGTCGCG | 150 | GGCCAATAGGGTATCGCAC  |
| 62 | GCTCGCCTGGTCGGACAGC  | 151 | GGTGACAATACAGTTCATA  |
| 63 | GTTGGGTGTACTGGTCCCT  | 152 | GAGTGACCGCGCACAAATGC |
| 64 | GCGTGCGATGTTTACAGTG  | 153 | GATCGCTTGATGGGCTAGG  |
| 65 | GGAAGTGGACTCACCCCTT  | 154 | GCGGCCAGCTCCTCTATGC  |
| 66 | GGGCATGAACAGTCCTTAG  | 155 | GGTTGGTGGGTGGGACGCG  |
| 68 | GCGCGTGTCTTACGTTTT   | 156 | GATACATTGGTTTTTCGCCC |
| 69 | GCGTAATTTGGGGATACGA  | 157 | GCGCTACTTACGGTCTTAT  |
| 70 | GACTGCTTCTATTTGACAA  | 159 | GACGCCGTAAAGTGCCCGA  |
| 71 | GTAGCAACTCTGGCGTAGT  | 160 | GTGTAAGCTATTTGTGTAC  |
| 72 | GGTCGGCAGTAAGCAGTGA  | 161 | GTGGTATCTCTGGTTCCTC  |
| 73 | GCCCATTCGCTCTTGTTCA  | 162 | GGTTACCGCGTCATCTATG  |
| 74 | GGCTCCTTACGCGTAATGC  | 163 | GTAGTAGAGATGTAAGTGG  |
| 75 | GGTAAATCTTCCCTATCGG  | 164 | GTGTCATTCATCTCGTGTG  |
| 78 | GTGCGTGGGTAGCTCTTTC  | 165 | GCTTACGTTTTGTGCTATG  |
| 79 | GTGACACAGCCTACTAGCT  | 167 | GGACGCTTCGTGCGAGACG  |
| 80 | GGTGGTAATGAGGTCGTCT  | 168 | GTATTACCGTGTCTTTATC  |
| 81 | GGTCCGCAACACCGCGATA  | 169 | GAGCTTTAGTCGCGTGTCT  |
| 82 | GCCTCATGGCCAACATGTC  | 170 | GGTGGTCCCTCCCTCCTCC  |
| 83 | GCGTGATGGGCCCTAAATG  | 172 | GTTGTCCTTCTGCCAGAA   |
| 84 | GGGAGGGCTGGTCTTATGT  | 173 | GTTGTCCTACCGGTATTA   |
| 85 | GGTTGTAGCTCAATTGTGT  | 174 | GTAAACCACTGAGATGGT   |
| 86 | GGCTGACCAGTCCGCTTTT  | 175 | GGTAGGACCGAAAACGTAT  |
| 87 | GCTGGATGTCAGTCTATAT  | 176 | GGAGTGTATGTTGCTATCG  |
| 88 | GGTCTCAATACGCTTCTGT  | 177 | GGATTTTAGGCTCCCGTCC  |
| 89 | GGGGATACAAAGTCCTCGT  | 178 | GCAAGGTCGGTAAGTGTCT  |
| 90 | GGAGGACGTGCTTCGGGGA  | 179 | GGTGTGTGCTTGCCCTCG   |
| 91 | GTTTTGCCTAACGTGTCTGT | 180 | GGTTCACGCGCGAAATCGT  |
|    |                      | 181 | GGAGTAAAGATACTATCGC  |

\* Clones siRNA 46 and 171 were discarded because they did confer no or marginal survival, respectively, compared to control pEGFP-N1-transfected cells. Clones 129, 143, and 158 and 166 were further discarded because their complete target alignment was < 68 % and/or they presented a centered mismatch with its homologous target. Clones 16, 41, 42, 57, 67, 76, 77, and 140 had no effect size.

**Table S3.** Number of overrepresented pathways and terms from the built protein-protein interaction (PPI) networks or corresponding Largest Connected Components (LCC). Common overrepresented pathways among the three analyzed cases are quantified.

| Database.                                   | Adding Direct Interactors (1 <sup>st</sup> shell) |                                  | Adding Indirect Interactors (2 <sup>nd</sup> shell)<br>Very High Confident Interactions* | Common Overrepresented Pathways or Terms |
|---------------------------------------------|---------------------------------------------------|----------------------------------|------------------------------------------------------------------------------------------|------------------------------------------|
|                                             | High Confident Interactions*                      | Very High Confident Interactions |                                                                                          |                                          |
| <b>KEGG Pathways</b>                        | <b>52</b>                                         | <b>15</b>                        | 32                                                                                       | 10                                       |
| <b>Reactome</b>                             | 258                                               | 123                              | 442                                                                                      | 91                                       |
| Biology Process                             | 423                                               | 203                              | 474                                                                                      | 137                                      |
| <b>The Gene Ontology</b> Molecular Function | 89                                                | 64                               | 132                                                                                      | 30                                       |
| Cellular Component                          | 167                                               | 102                              | 215                                                                                      | 75                                       |

\* Overrepresented pathways and terms were obtained from the list of genes composing the LCC for the different explored PPIs (FDR adjusted  $p$ -value < 0.05). KEGG Pathways, Reactome and The Gene Ontology databases were independently considered.
